# Supplementary material for: High-precision measurement of europium isotopic composition of geological reference materials by multi-collector inductively coupled plasma mass spectrometry (MC-ICP-MS)
Source: Royal Society of Chemistry journal article supplement (doi:10.1039/d3ja00042g), 2023-01-01
Supplement: d3ja00042g1.pdf [file d3ja00042g1.pdf]

## **Appendix**

Appendix – Table 1: Data for Figure 2.

Appendix – Table 2: Data for Figure 3.

Appendix – Table 3: Data for Figure 4.

Appendix – Table 4: Data for Figure 5.

Appendix – Table 5: Data for Figure 6.
