# Supplementary material for: High-precision measurement of europium isotopic composition of geological reference materials by multi-collector inductively coupled plasma mass spectrometry (MC-ICP-MS)
Source: Royal Society of Chemistry journal article supplement (doi:10.1039/d3ja00042g), 2023-01-01
Supplement: d3ja00042g2.xlsx [file d3ja00042g2.xlsx]

## Sheet: Appendix-Table 1.
	Sequence date (dd/mm/yyyy)	NIST 3117a Eu – NIST 3147a Sm concentration (ppb - ppb)	NIST 3117a Eu – NIST 3118a Gd concentration (ppb - ppb)	153Eu/151Eu Raw	2SE	n	𝝱Eu	n	𝝱Sm or 𝝱Gd	n	153Eu/151Eu corrected with 𝝱Eu (SSB)	2SD	2SD (ppm)	n	εEu	2 SD	n	153Eu/151Eu corrected with 𝝱Sm or 𝝱Gd	2 SD	2SD (ppm)	n	εEu	2 SD	n
1	2021-01-26		16-48	1.10651	1.60371e-06	9	-1.03007	9	-0.779488	9		0.000556159	509.481	7		9.69109	5	1.09517	0.000102489	93.5823	9		0.707531	7
2	2021-01-26		16-48	1.10638	1.03759e-06		-1.02061		-0.780234		1.09149							1.09515				-0.414941
3	2021-01-26		16-48	1.10646	8.49469e-07		-1.02641		-0.779714		1.09179				3.18862			1.09523				0.439114
4	2021-01-26		16-48	1.10616	5.04046e-06		-1.0057		-0.78033		1.09139				-2.57437			1.0952				-0.0684464
5	2021-01-26		16-48	1.10627	1.00415e-06		-1.01352		-0.764165		1.09156				-1.48987			1.09519				-0.0572862
6	2021-01-26		16-48	1.10647	1.7944e-06		-1.02671		-0.779949		1.09205				5.97594			1.0952				0.0168807
7	2021-01-26		16-48	1.10574	7.60691e-07		-0.976909		-0.73679		1.09124				-6.28256			1.0952				0.0115054
8	2021-01-26		16-48	1.10574	1.26144e-06		-0.977141		-0.727516		1.0918							1.0952				0.652244
9	2021-01-26		16-48	1.10534	9.67703e-07		-0.949614		-0.71004									1.09505
	Mean										1.09162							1.09518
10	2021-02-01		10-24	1.10862	3.39218e-06	7	-1.17468	7	-0.941931	7		0.000132083	121	5		2.4751	3	1.09495	1.28131e-05	11.7019	7		0.207186	5
11	2021-02-01		10-24	1.10845	1.63103e-06		-1.16259		-0.929764		1.09158							1.09495				0.00532177
12	2021-02-01		10-24	1.10832	2.44154e-06		-1.1537		-0.920866		1.09164				0.989357			1.09495				-0.0428652
13	2021-02-01		10-24	1.10811	1.35595e-06		-1.1392		-0.905711		1.09149				-1.33799			1.09496				0.0895618
14	2021-02-01		10-24	1.10812	1.03732e-06		-1.14033		-0.907553		1.09163				0.555206			1.09495				-0.118201
15	2021-02-01		10-24	1.10808	9.0469e-07		-1.13772		-0.903855		1.09165							1.09497				0.142209
16	2021-02-01		10-24	1.10795	1.16607e-06		-1.12884		-0.896042									1.09495
	Mean										1.0916							1.09496
17	2021-10-04	20-40		1.10637	8.86994e-06	7	-1.02033	7	-0.793054	7		9.60649e-05	88.0061	5		0.451633	3	1.09487	3.19443e-05	29.1772	7		0.203309	5
18	2021-10-04	20-40		1.10616	1.04034e-05		-1.00567		-0.78079		1.09152							1.09484				-0.144245
19	2021-10-04	20-40		1.1061	7.47361e-06		-1.00156		-0.776878		1.09162				0.493057			1.09484				0.0444143
20	2021-10-04	20-40		1.10599	6.99646e-06		-0.994305		-0.770501		1.09161				0.131575			1.09482				-0.113006
21	2021-10-04	20-40		1.10586	1.89771e-05		-0.985206		-0.760563		1.09158				0.0778441			1.09484				0.0244249
22	2021-10-04	20-40		1.10578	6.3798e-06		-0.979547		-0.754436		1.09152							1.09484				0.0854824
23	2021-10-04	20-40		1.10586	7.99106e-06		-0.98498		-0.760698									1.09483
	Mean										1.09157							1.09484
24	2022-02-15	10-20		1.10731	2.05925e-05	7	-1.08431	7	-0.853904	7		0.00021615	198.018	5		2.68088	3	1.09492	3.92845e-05	35.8795	7		0.539305	5
25	2022-02-15	10-20		1.10696	4.87815e-06		-1.06052		-0.829852		1.09139							1.09492				0.131876
26	2022-02-15	10-20		1.10703	7.7852e-06		-1.06532		-0.836391		1.09169				1.94525			1.0949				-0.17694
27	2022-02-15	10-20		1.10691	7.63649e-06		-1.05706		-0.827172		1.09157				-0.68639			1.09491				0.250755
28	2022-02-15	10-20		1.10685	5.57371e-06		-1.05311		-0.826085		1.09159				0.1865			1.09487				-0.339487
29	2022-02-15	10-20		1.10681	5.36622e-06		-1.05005		-0.820727		1.09158							1.0949				0.25916
30	2022-02-15	10-20		1.10681	6.02405e-06		-1.05009		-0.822404									1.09488
	Mean										1.09157							1.0949

## Sheet: Appendix-Table 2.
Sequence date (dd/mm/yyyy)	NIST 3117a Eu – NIST 3147a Sm concentration (ppb - ppb)	153Eu/151Eu Raw	2SE	n	𝝱Eu	2SE	n	𝝱Sm	2SE	n	153Eu/151Eu corrected with 𝝱Sm	2SD	2SD (ppm)	n	εEu	2 SD	n	Slope A 𝝱Sm = A(𝝱Eu) + B	Intercept B 𝝱Sm = A(𝝱Eu) + B	153Eu/151Eu corrected with weighted linear regression	2SD	2SD (ppm)	n	εEu	2SD	n
2021-10-04	20-40	1.10637	8.86994e-06	7	-1.02033	0.000608551	7	-0.793054	0.000566848	7	1.09487	3.19443e-05	29.1772	7	0.305644	0.291772	5	0.9667	0.1931	1.0916	2.55828e-05	23.4365	7	0.205652	0.234365	5
2021-10-04	20-40	1.10616	1.04034e-05		-1.00567	0.000713906		-0.78079	0.000908118		1.09484				-0.00946066					1.09158				-0.0538763
2021-10-04	20-40	1.1061	7.47361e-06		-1.00156	0.000512878		-0.776878	0.000600528		1.09484				-0.0360709					1.09157				-0.062759
2021-10-04	20-40	1.10599	6.99646e-06		-0.994305	0.000480184		-0.770501	0.000623362		1.09482				-0.151509					1.09157				-0.149303
2021-10-04	20-40	1.10586	1.89771e-05		-0.985206	0.00130251		-0.760563	0.00136963		1.09484				-0.0409364					1.09158				0.00632233
2021-10-04	20-40	1.10578	6.3798e-06		-0.979547	0.000437944		-0.754436	0.000564696		1.09484				0.0207866					1.09159				0.0957885
2021-10-04	20-40	1.10586	7.99106e-06		-0.98498	0.000548509		-0.760698	0.000703756		1.09483				-0.0884539					1.09158				-0.0418246
Mean		1.10602									1.09484									1.09158
2021-12-21	10-20	1.10913	6.17851e-06	12	-1.20922	0.000422848	12	-0.978278	0.000766756	12	1.09493	2.54926e-05	23.2827	12	0.123817	0.232827	10	0.8918	0.0998	1.0916	1.59058e-05	14.5711	12	0.033616	0.145711	10
2021-12-21	10-20	1.10918	7.35497e-06		-1.21293	0.000503337		-0.981926	0.00075003		1.09493				0.13218					1.0916				-0.0163262
2021-12-21	10-20	1.10914	7.23375e-06		-1.20968	0.000495061		-0.979266	0.000784736		1.09492				0.0543511					1.0916				-0.0516452
2021-12-21	10-20	1.10904	9.24019e-06		-1.20286	0.000632436		-0.972223	0.000896856		1.09492				0.0838063					1.09161				0.0904003
2021-12-21	10-20	1.10912	8.53644e-06		-1.20884	0.000584217		-0.979076	0.000889528		1.09491				-0.0315781					1.09159				-0.134531
2021-12-21	10-20	1.10906	7.67453e-06		-1.20438	0.000525266		-0.974066	0.000663817		1.09492				0.0408879					1.0916				0.0180203
2021-12-21	10-20	1.10901	9.23846e-06		-1.20113	0.000632329		-0.970943	0.000905117		1.09492				0.0252016					1.09161				0.0522425
2021-12-21	10-20	1.10902	7.52198e-06		-1.20201	0.000514842		-0.97211	0.000838911		1.09491				-0.0133976					1.0916				-0.00500857
2021-12-21	10-20	1.10901	8.15148e-06		-1.20115	0.000557933		-0.970427	0.000829989		1.09492				0.0960113					1.09162				0.131315
2021-12-21	10-20	1.10897	7.21302e-06		-1.19839	0.000493717		-0.969187	0.000586264		1.0949				-0.104967					1.0916				-0.0498531
2021-12-21	10-20	1.10889	6.57751e-06		-1.19264	0.000450251		-0.96421	0.000665348		1.09489				-0.206972					1.09159				-0.0723048
2021-12-21	10-20	1.10882	7.92002e-06		-1.18839	0.000542179		-0.959909	0.000772211		1.09489				-0.19934					1.0916				0.00407506
Mean		1.10903									1.09491									1.0916
2022-02-15	10-20	1.10674	5.41951e-06	8	-1.04557	0.000371703	8	-0.816517	0.00163782	8	1.0949	2.84644e-05	25.997	8	-0.106419	0.25997	6	1.038	0.2688	1.0916	2.67317e-05	24.4885	8	-0.00283488	0.244885	6
2022-02-15	10-20	1.10636	6.53476e-06		-1.01964	0.000448345		-0.791777	0.00223556		1.09488				-0.263088					1.09157				-0.278846
2022-02-15	10-20	1.10641	5.98493e-06		-1.02269	0.000410608		-0.792636	0.00232569		1.09491				0.024743					1.0916				0.013123
2022-02-15	10-20	1.10642	4.69003e-06		-1.02337	0.000321763		-0.792846	0.00147652		1.09492				0.0877618					1.09161				0.0771939
2022-02-15	10-20	1.1064	5.5975e-06		-1.02191	0.000384028		-0.792024	0.0016338		1.09491				0.00376222					1.0916				-0.010775
2022-02-15	10-20	1.1064	1.62142e-05		-1.02208	0.00111237		-0.791038	0.00227754		1.09493				0.15567					1.09162				0.136369
2022-02-15	10-20	1.10641	5.69286e-06		-1.0229	0.000390567		-0.792777	0.00230513		1.09491				0.0344481					1.0916				0.0235091
2022-02-15	10-20	1.10638	5.82151e-06		-1.02106	0.000399404		-0.790717	0.00204467		1.09492				0.0631214					1.0916				0.0422607
Mean		1.10644									1.09491									1.0916

## Sheet: Appendix-Table 3.
Sequence date (dd/mm/yyyy)	151Eu/147Sm	εEu	2SD (repeated measure of NIST 3117a during the sequence)
2021-12-16	31.8378	-0.633945	0.381319
2021-12-16	0.227357	0.203974	0.381319
2021-12-16	0.600309	-0.1903	0.381319
2021-12-16	3.44276	-0.22397	0.381319
2021-12-16	1.37198	-0.122436	0.381319
2021-12-16	6.58837	-0.618686	0.381319
2021-12-16	2.77643	-0.219262	0.381319
2021-12-16	1.89262	-0.485352	0.381319
2021-12-16	3.58035	-0.387229	0.381319
2021-12-16	2.34353	-0.33842	0.381319
2021-12-16	14.5871	-0.670953	0.381319
2021-12-16	1.43243	0.431161	0.381319
2021-12-16	2.16951	0.403508	0.381319
2021-12-16	2.55069	0.840935	0.381319
2021-12-16	3.00886	0.398343	0.381319
2021-12-16	4.12202	-0.194401	0.381319
2021-12-16	2.62957	-0.3784	0.381319
2021-12-16	2.0014	-0.269214	0.381319
2021-12-16	1.59589	-0.224145	0.381319
2021-12-16	3.60962	-0.296047	0.381319
2021-12-16	3.09126	-0.137698	0.381319
2021-12-16	1.52816	0.203564	0.381319
2021-12-16	2.69399	-0.236089	0.381319
2021-12-16	2.25413	-0.133849	0.381319
2021-12-16	3.22115	-0.105645	0.381319
2021-12-16	3.59841	-0.134236	0.381319
2021-12-17	37.0622	0.0119136	0.214287
2021-12-17	0.265113	-0.0458612	0.214287
2021-12-17	0.581845	0.101754	0.214287
2021-12-17	3.25677	-0.127945	0.214287
2021-12-17	1.34956	0.108437	0.214287
2021-12-17	6.09945	-0.36371	0.214287
2021-12-17	2.64588	-0.112204	0.214287
2021-12-17	1.73912	0.0358539	0.214287
2021-12-17	3.2148	-0.0221104	0.214287
2021-12-17	2.11853	-0.121742	0.214287
2021-12-17	12.9972	-0.658606	0.214287
2021-12-17	1.23917	0.330879	0.214287
2021-12-17	2.01347	0.0636613	0.214287
2021-12-17	2.37615	0.174535	0.214287
2021-12-17	2.73222	-0.142192	0.214287
2021-12-17	3.79345	0.0345035	0.214287
2021-12-17	2.42733	0.0225436	0.214287
2021-12-17	1.81955	0.291292	0.214287
2021-12-17	1.6274	0.16	0.214287
2021-12-17	3.70482	-0.281269	0.214287
2021-12-17	2.99819	-0.219836	0.214287
2021-12-17	1.58724	0.145969	0.214287
2021-12-17	2.75602	-0.242935	0.214287
2021-12-17	2.26129	-0.0403973	0.214287
2021-12-17	3.08749	0.00282175	0.214287
2021-12-17	3.4956	-0.190322	0.214287
2022-02-14	0.60949	0.202991	0.507281
2022-02-14	12.1321	0.0449257	0.507281
2022-02-14	1.25132	0.358104	0.507281
2022-02-14	6.34109	-0.405823	0.507281
2022-02-14	2.40668	-0.0440283	0.507281
2022-02-14	4.69178	-0.428498	0.507281
2022-02-14	3.63924	0.00967085	0.507281
2022-02-14	3.73803	-0.165811	0.507281
2022-02-14	12.0515	-0.644957	0.507281
2022-02-14	2.35228	-0.0256791	0.507281
2022-02-14	0.588274	-0.314428	0.507281
2022-02-14	4.57389	-0.399414	0.507281
2022-02-14	6.20867	-0.541268	0.507281
2022-02-14	1.20558	0.280479	0.507281

## Sheet: Appendix-Table 4.
	Values from the 28/06/2021 sequence
	Masses	AME 2012		Tuning	NIST 3117a Eu (10 ppb)	Ba monoelementary solution (10 ppb)
	M 147Sm	146.915		151Eu (V)	9.08926
	M 149Sm	148.917		153Eu (V)	10.089
	M 150Sm	149.917		135Ba (V)		0.12
	M 151Eu	150.92		137Ba (V)		0.2
	M 152Gd	151.92		151Eu16O (mV)	0.45
	M 153Eu	152.921		153Eu16O (mV)	0.7
	M 155Gd	154.923		135Ba16O (mV)		1.29
	M 156Gd	155.922		137Ba16O (mV)		1.6
	M 157Gd	156.924
				Oxydation rate			Average 𝝱Eu corrected with 𝝱Sm for this sequence		Mean values are used because we can not calculate the real beta Eu because of the presence of Ba
				151Eu	0.0049509		-1.2681
				153Eu	0.00693824
				135Ba	1.075		Average 153/151Eu corrected with 𝝱Eu corrected for this sequence
				137Ba	0.8		1.0916
	153/151 with Ba Tox ~0,1%
	Eu (ppb)	Ba/Eu	Ba (ppb)	135Ba (V théorique)	137Ba (V théorique)	135Ba16O (V théorique)	137Ba16O (V théorique)	153/151 with 135Ba Tox ~0,1%	153/151 corrected	εEu
	10	0	0	0	0	0	0	1.10999	1.0916	0
		0.01	0.1	0.012	0.02	1.2e-05	2e-05	1.10999	1.09161	0.00662112
		0.05	0.5	0.06	0.1	6e-05	0.0001	1.11	1.09161	0.0331054
		0.1	1	0.12	0.2	0.00012	0.0002	1.11	1.09161	0.0662104
		0.5	5	0.6	1	0.0006	0.001	1.11003	1.09164	0.331035
		1	10	1.2	2	0.0012	0.002	1.11007	1.09168	0.662025
		2	20	2.4	4	0.0024	0.004	1.11014	1.09175	1.32388
		5	50	6	10	0.006	0.01	1.11036	1.09197	3.30838
		10	100	12	20	0.012	0.02	1.11073	1.09233	6.6124
	153/151 with Ba Tox ~0,5%
	Eu (ppb)	Ba/Eu	Ba (ppb)	135Ba (V théorique)	137Ba (V théorique)	135Ba16O (V théorique)	137Ba16O (V théorique)	153/151 with 135Ba Tox ~0,1%	153/151 corrected	εEu
	10	0	0	0	0	0	0	1.10999	1.0916	0.0415695
		0.01	0.1	0.012	0.02	6e-05	0.0001	1.11	1.09161	0.0746751
		0.05	0.5	0.06	0.1	0.0003	0.0005	1.11001	1.09162	0.207093
		0.1	1	0.12	0.2	0.0006	0.001	1.11003	1.09164	0.372605
		0.5	5	0.6	1	0.003	0.005	1.11018	1.09179	1.69631
		1	10	1.2	2	0.006	0.01	1.11036	1.09197	3.34996
		2	20	2.4	4	0.012	0.02	1.11073	1.09233	6.654
		5	50	6	10	0.03	0.05	1.11183	1.09341	16.54
		10	100	12	20	0.06	0.1	1.11364	1.09519	32.9302
	153/151 with Ba Tox ~1%
	Eu (ppb)	Ba/Eu	Ba (ppb)	135Ba (V théorique)	137Ba (V théorique)	135Ba16O (V théorique)	137Ba16O (V théorique)	153/151 with 135Ba Tox ~0,1%	153/151 corrected	εEu
	10	0	0	0	0	0	0	1.10999	1.0916	0.0415695
		0.01	0.1	0.012	0.02	0.00012	0.0002	1.11	1.09161	0.10778
		0.05	0.5	0.06	0.1	0.0006	0.001	1.11003	1.09164	0.372605
		0.1	1	0.12	0.2	0.0012	0.002	1.11007	1.09168	0.703598
		0.5	5	0.6	1	0.006	0.01	1.11036	1.09197	3.34996
		1	10	1.2	2	0.012	0.02	1.11073	1.09233	6.654
		2	20	2.4	4	0.024	0.04	1.11146	1.09305	13.249
		5	50	6	10	0.06	0.1	1.11364	1.09519	32.9302
		10	100	12	20	0.12	0.2	1.11725	1.09874	65.3904
	153/151 with Ba Tox ~2%
	Eu (ppb)	Ba/Eu	Ba (ppb)	135Ba (V théorique)	137Ba (V théorique)	135Ba16O (V théorique)	137Ba16O (V théorique)	153/151 with 135Ba Tox ~0,1%	153/151 corrected	εEu
	10	0	0	0	0	0	0	1.10999	1.0916	0.0415695
		0.01	0.1	0.012	0.02	0.00024	0.0004	1.11001	1.09162	0.173989
		0.05	0.5	0.06	0.1	0.0012	0.002	1.11007	1.09168	0.703598
		0.1	1	0.12	0.2	0.0024	0.004	1.11014	1.09175	1.36545
		0.5	5	0.6	1	0.012	0.02	1.11073	1.09233	6.654
		1	10	1.2	2	0.024	0.04	1.11146	1.09305	13.249
		2	20	2.4	4	0.048	0.08	1.11292	1.09448	26.3871
		5	50	6	10	0.12	0.2	1.11725	1.09874	65.3904
		10	100	12	20	0.24	0.4	1.12431	1.10569	129.058
	Values from the session of the 18/10/2022 with Tox Ba ~0.8%
	Eu (ppb)	Ba/Eu	Ba (ppb)	153/151 with Ba Tox ~1%	153/151 corrected	εEu	2SE
	10	0.1	1	1.11151	1.09174	0.81902	0.0841078
		0.3	3	1.11167	1.09183	1.80403	0.09
		0.5	5	1.11177	1.09196	2.95359	0.09
		0.7	7	1.11188	1.09209	4.02482	0.09
		1	10	1.11211	1.09231	6.19629	0.1
		1.5	15	1.11237	1.0925	7.89402	0.11
		2	20	1.11264	1.09281	10.8877	0.14
		3	30	1.11323	1.0934	16.1483	0.15

## Sheet: Appendix-Table 5.
Sample	εEu of the collected fraction	2SE	mL of collected 0.5 M HCl	Percentage of Eu in the collected fraction (%)	Cumulated yield from the beginning of the peak (%)	Cumulated εEu from the front of the peak	Cumulated yield from the end of the peak (%)	Cumulated εEu from the tail of the peak
Batch a-4	9.24	0.13	5.9	0.75	0.75	9.24	5.8	-2.97
Batch a-5	4.9	0.13	6.2	8.5	9.25	5.25189	19.3	-2.39642
Batch a-6	3.09	0.175785	6.5	20.8	30.05	3.75547	43.8	-1.08952
Batch a-7	-0.4	0.156239	6.8	24.9	54.95	1.87247	68.7	-0.839607
Batch a-8	-0.06	0.175659	7.1	24.5	79.45	1.27655	89.5	0.0736425
Batch a-9	-2.15	0.132753	7.4	13.5	92.95	0.778881	98	0.492255
Batch a-10	-2.97	0.1	7.7	5.8	98.75	0.558694	98.75	0.558694
Batch b-4	6.87	0.119686	5.9	1.3	1.3	6.87	7.3	-1.21
Batch b-5	4.03	0.107161	6.2	7.4	8.7	4.45437	20.5	-1.56415
Batch b-6	1.26	0.145291	6.5	20.6	29.3	2.2085	41.5	-1.45072
Batch b-7	0.22	0.151488	6.8	22.6	51.9	1.3426	64.1	-0.861669
Batch b-8	-1.34	0.147116	7.1	21	72.9	0.569835	84.7	-0.345655
Batch b-9	-1.76	0.137264	7.4	13.2	86.1	0.212648	92.1	0.00591748
Batch b-10	-1.21	0.14	7.7	7.3	93.4	0.101456	93.4	0.101456
